# Supplementary material for: One of the isoamylase isoforms, CMI294C, is required for semi-amylopectin synthesis in the rhodophyte Cyanidioschyzon merolae
Source: Frontiers journal article supplement (doi:10.3389/fpls.2022.967165), 2022-08-16
Supplement: Data_Sheet_1.PDF [file Data_Sheet_1.PDF]

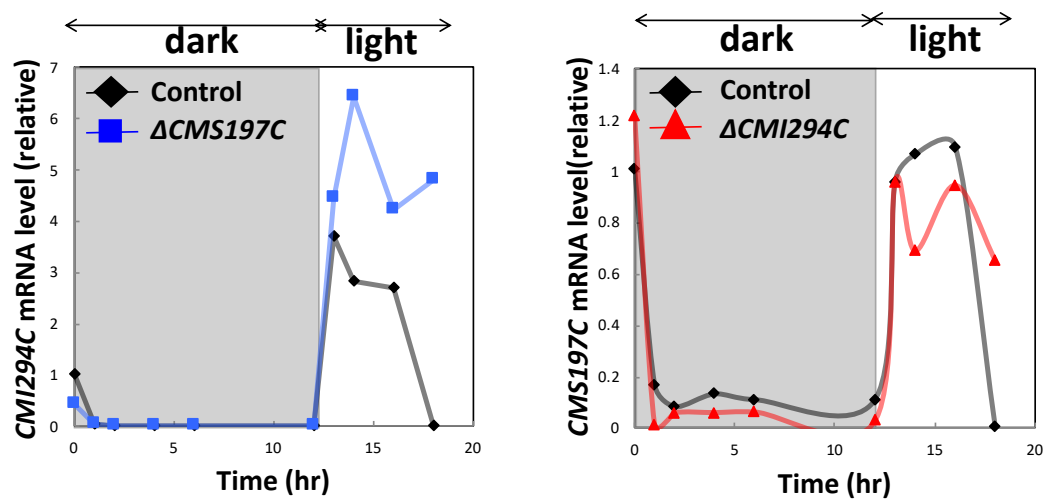

**Fig. S1.** Expression of the *CMI294C* and *CMS197C* genes under dark and light conditions in the control and the  $\Delta CMI294C$  and  $\Delta CMS197C$  strains. Cells grown in light were transferred to dark conditions for 12 h and then back to light conditions. The mRNA levels were measured by quantitative real-time PCR, and the mRNA levels of individual genes are plotted relative to those at 0 h.

**a** Control

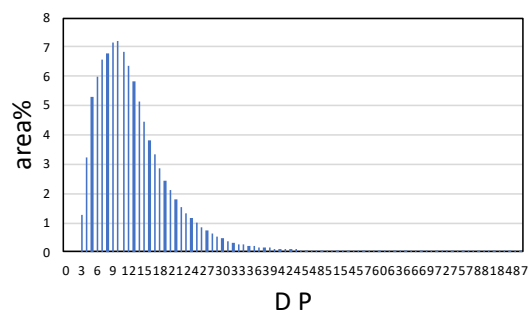

**b**  $\Delta CMI294C$

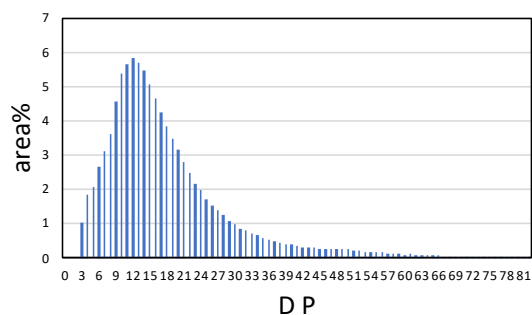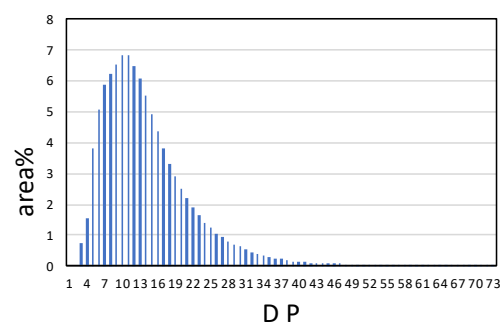

**c**  $\Delta CMS197C$

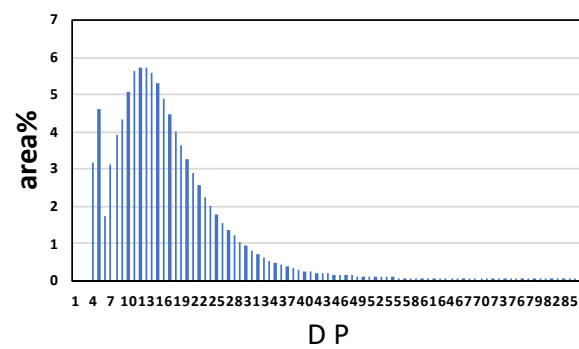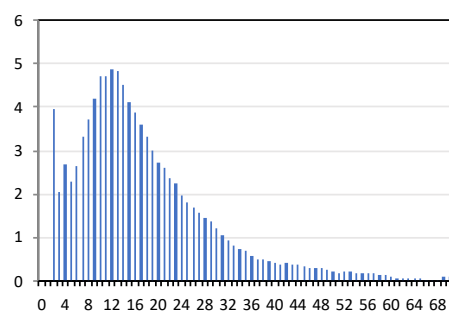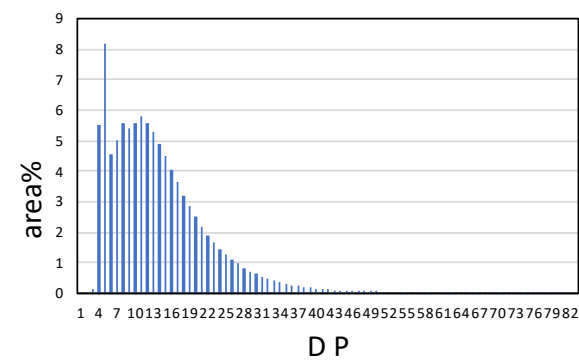

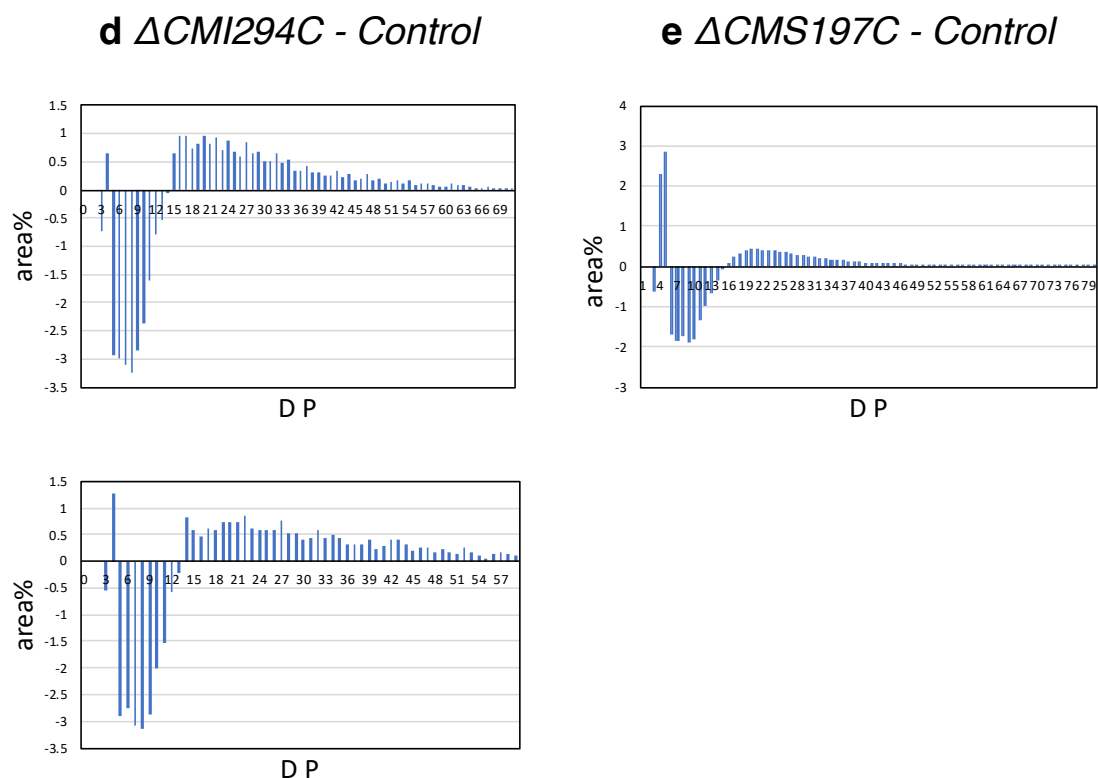

**Fig. S2.** Supplementary data of Fig. 7. Comparison of the chain-length distribution between starch from the control strain and those from the  $\Delta CMI294C$  and  $\Delta CMS197C$  strains. Starch samples were isolated from late-log phase cells grown under continuous illumination with constant air bubbling containing 2% CO<sub>2</sub>. The chain-length profiles (a–c) and differences in chain-length profiles (d, e) are shown. The abundance of chains with individual degrees of polymerization (DP) was plotted as area % of the chromatograms obtained by the capillary electrophoresis.
