# Supplementary material for: One of the isoamylase isoforms, CMI294C, is required for semi-amylopectin synthesis in the rhodophyte Cyanidioschyzon merolae
Source: Front Plant Sci. 2022 Aug 16;13:967165. doi: 10.3389/fpls.2022.967165 (PMC9424615; doi:10.3389/fpls.2022.967165)
Supplement: Supplementary file 2 [file Data_Sheet_10.xlsx]

## Sheet: Sheet1
Table 1 Fractionation of α -glucans from C. merolae by centrifugation
Fraction	Glucan yield (%)
	Control	DCMI294C	DCMS197C
3000Xg ppt	81 + 6	79 + 37	79 + 28
10000X ppt	13 + 5	13 + 12	16 + 0
100000Xg ppt	5 + 1	7 + 1	5 + 1
100000Xg sup	1 + 1	1 + 2	0 + 1
Extracts that were prepared by sonication were initially centrifuged at 3000 × g for 15 min. The supernatants were further centrifuged at 10000 × g for 15 min, followed by ultracentrifugation at 100000 × g for 1 h. Each fraction was converted to glucose by glucoamylase digestion. The total content of α-glucan in each fraction was determined using hexokinase and glucose-6-phosphate dehydrogenase a…
